# Supplementary material for: How a European network may help estimating methane emissions at the French national scale
Source: Copernicus journal article supplement (doi:10.5194/acp-2017-666), 2017-10-06
Supplement: Supplementary file 1 [file acp-2017-666-supplement.pdf]

# How a European network may help estimating methane emissions at the French national scale

Isabelle Pison<sup>1</sup>, Antoine Berchet<sup>2</sup>, Marielle Saunois<sup>1</sup>, Philippe Bousquet<sup>1</sup>, Grégoire Broquet<sup>1</sup>, Sébastien Conil<sup>3</sup>, Marc Delmotte<sup>1</sup>, Olivier Laurent<sup>1</sup>, Damien Martin<sup>4</sup>, Simon O'Doherty<sup>5</sup>, Michel Ramonet<sup>1</sup>, T. Gerard Spain<sup>6</sup>, Kieran Stanley<sup>5</sup>, Alex Vermeulen<sup>7,a</sup>, and Camille Yver Kwok<sup>1</sup>

<sup>1</sup>Laboratoire des Sciences du Climat et de l'Environnement, LSCE-IPSL (CEA-CNRS-UVSQ), Université Paris-Saclay, 91191 Gif-sur-Yvette, France.

<sup>2</sup>Laboratory for Air Pollution/Environmental Technology, Empa - Swiss Federal Laboratories for Materials Science and Technology, Dübendorf, Switzerland

<sup>3</sup>Agence Nationale pour la gestion des Déchets RadioActifs, Châtenay-Malabry, France

<sup>4</sup>Centre for Climate and Air Pollution Studies, School of Physics, National University of Ireland Galway, Galway, Ireland

<sup>5</sup>Atmospheric Chemistry Research Group, School of Chemistry, University of Bristol, Cantocks Close, Bristol, United Kingdom

<sup>6</sup>National University of Ireland Galway, Galway, Ireland

<sup>7</sup>Energy Research Centre of the Netherlands, Heerhugowaard, The Netherlands

<sup>a</sup>now at Dept. Phys. Geography and Ecosystem Science, Lund, Sweden

Correspondence to: I. Pison (isabelle.pison@lsce.ipsl.fr)

## Supplementary material

### S.1 Time series of the afternoon (14 h-18 h) hourly data at the stations in 2012

Only the data selected for assimilation is shown here i.e the 14 h-18 h hourly means when the boundary layer height is higher than 500 m in the model, at the highest available level for sites with several levels.

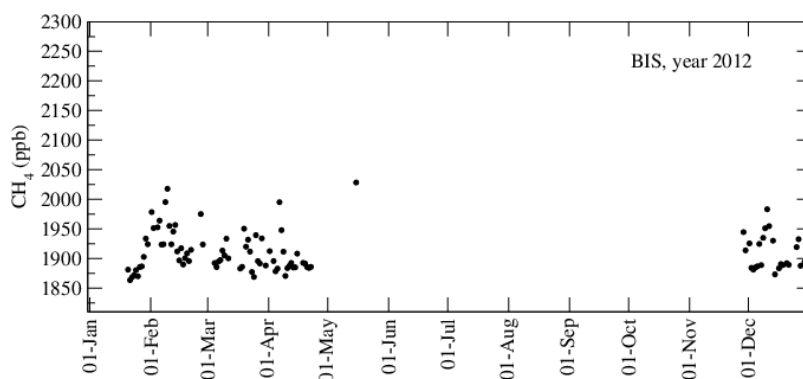

**Figure S.1.** Afternoon hourly means of CH<sub>4</sub> mixing ratios at Biscarosse (France) in 2012.

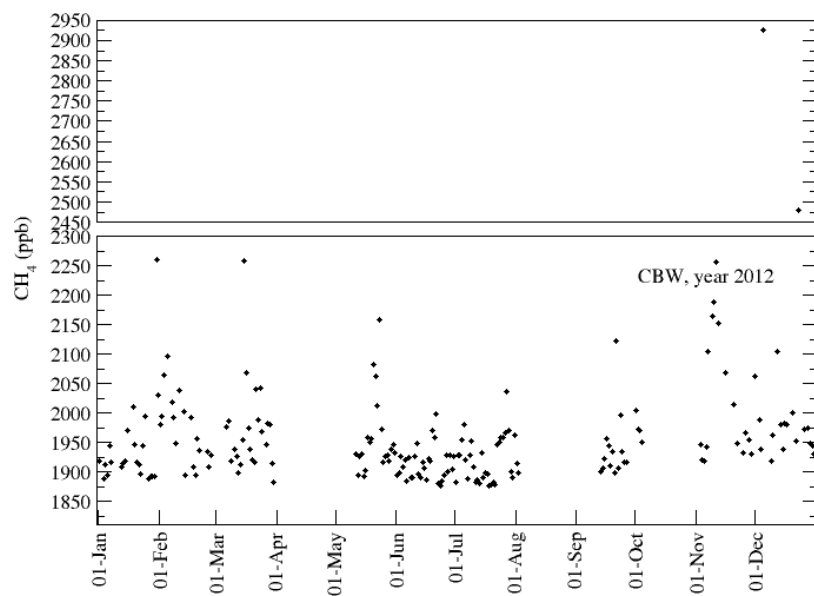

**Figure S.2.** Afternoon hourly means of  $\text{CH}_4$  mixing ratios at Cabauw (The Netherlands) in 2012.

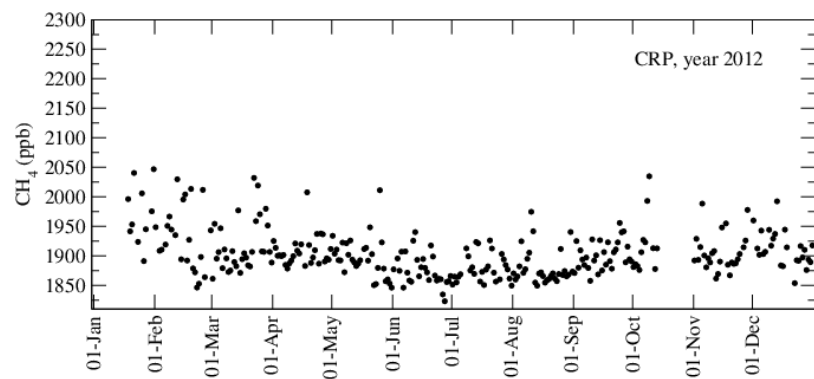

**Figure S.3.** Afternoon hourly means of  $\text{CH}_4$  mixing ratios at Carnsore Point (Ireland) in 2012.

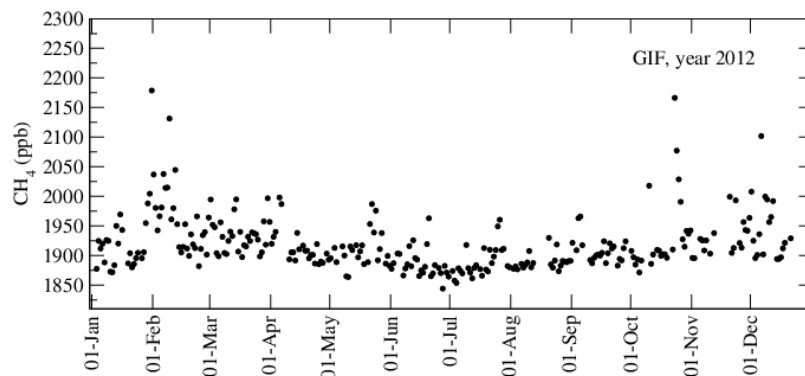

**Figure S.4.** Afternoon hourly means of  $\text{CH}_4$  mixing ratios at Gif-sur-Yvette (France) in 2012.

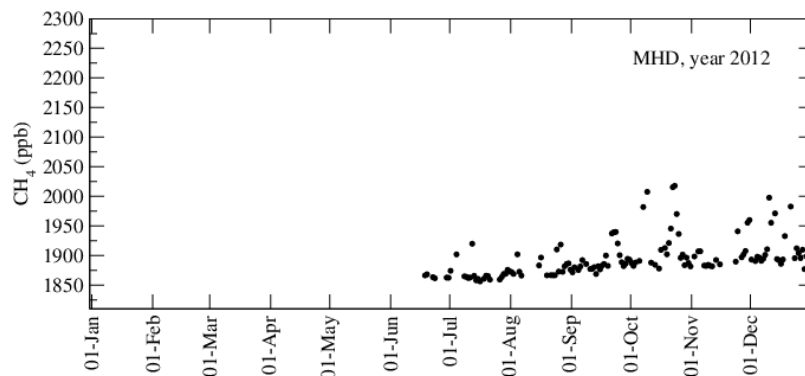

**Figure S.5.** Afternoon hourly means of  $\text{CH}_4$  mixing ratios at Mace Head (Ireland) in 2012.

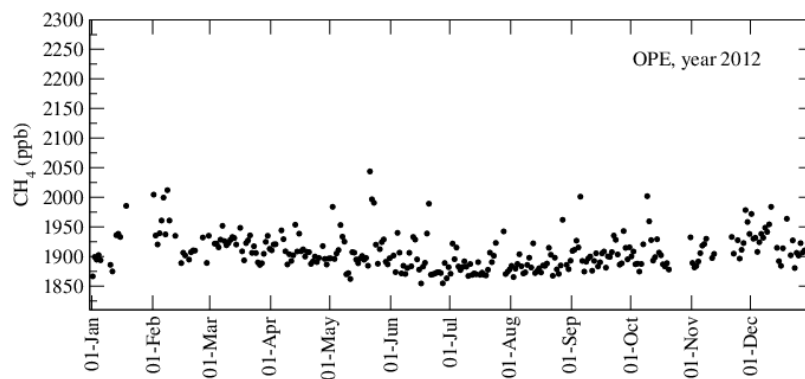

**Figure S.6.** Afternoon hourly means of  $\text{CH}_4$  mixing ratios at the Observatoire Pérenne de l'Environnement (France) in 2012.

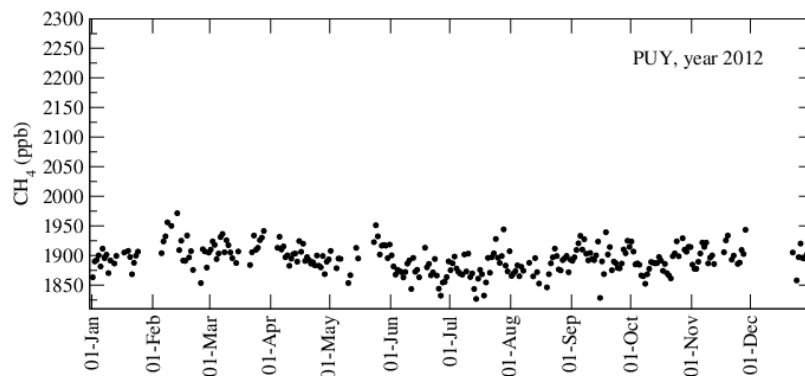

**Figure S.7.** Afternoon hourly means of  $\text{CH}_4$  mixing ratios at Puy-de-Dôme (France) by a gas-chromatograph in 2012.

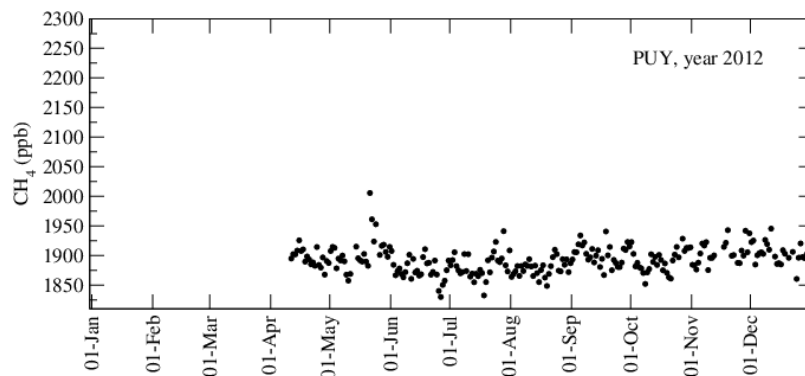

**Figure S.8.** Afternoon hourly means of  $\text{CH}_4$  mixing ratios at Puy-de-Dôme (France) by a Picarro instrument in 2012.

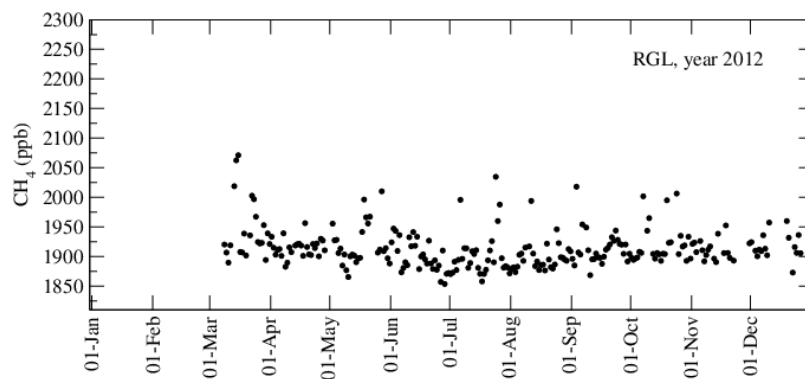

**Figure S.9.** Afternoon hourly means of  $\text{CH}_4$  mixing ratios at Ridge Hill (United Kingdom) in 2012.

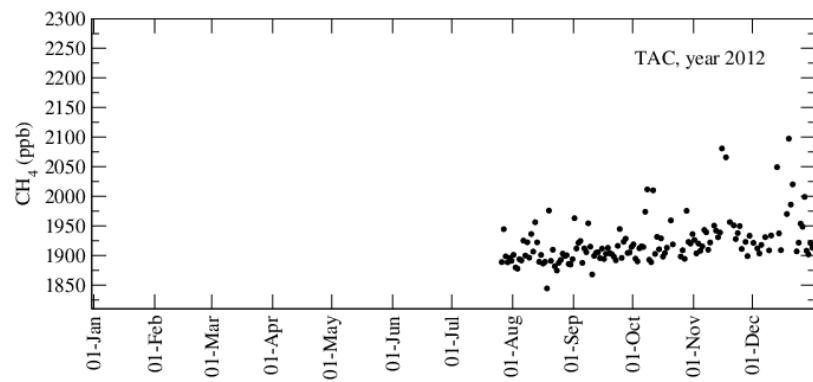

**Figure S.10.** Afternoon hourly means of  $\text{CH}_4$  mixing ratios at Tacolneston (United Kingdom) in 2012.

## S.2 Prior maps of CH<sub>4</sub> emissions by IER

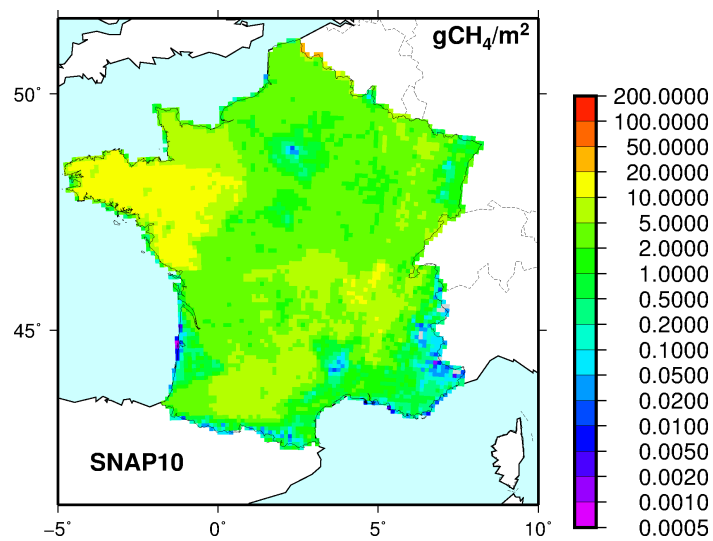

**Figure S.11.** SNAP 10: agriculture, yearly total in France in 2012: 2356 Gg.

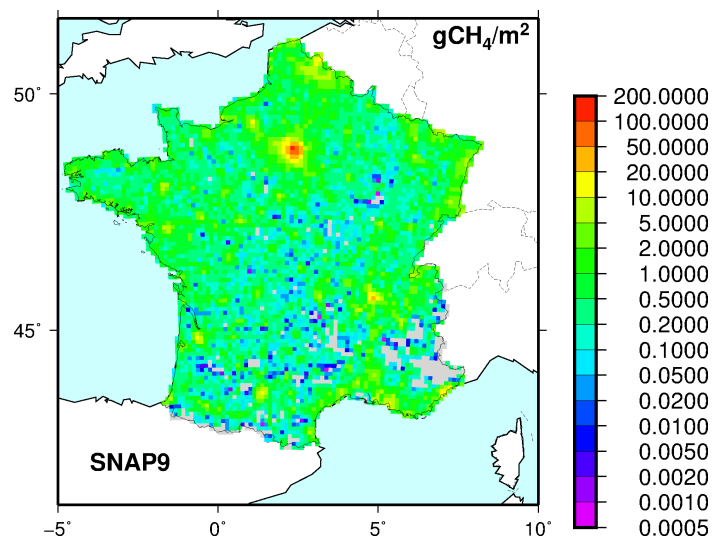

**Figure S.12.** SNAP 9: waste treatment and disposal, yearly total in France in 2012: 522 Gg.

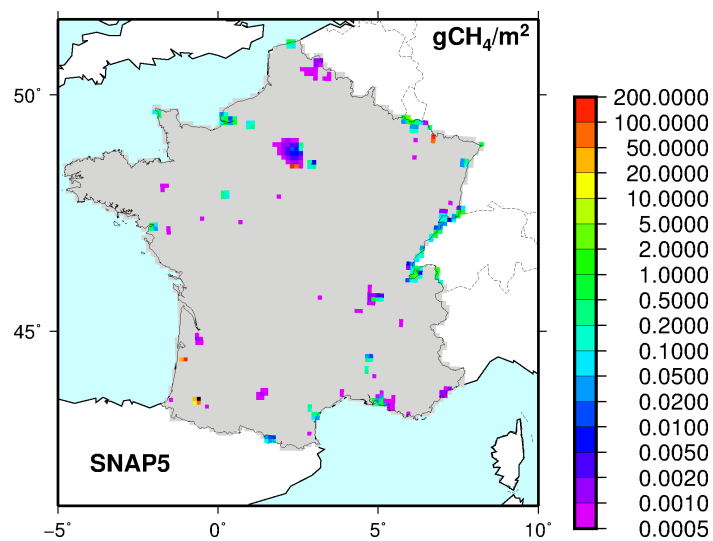

**Figure S.13.** SNAP 5: distribution of fossil fuel, yearly total in France in 2012: 94 Gg.

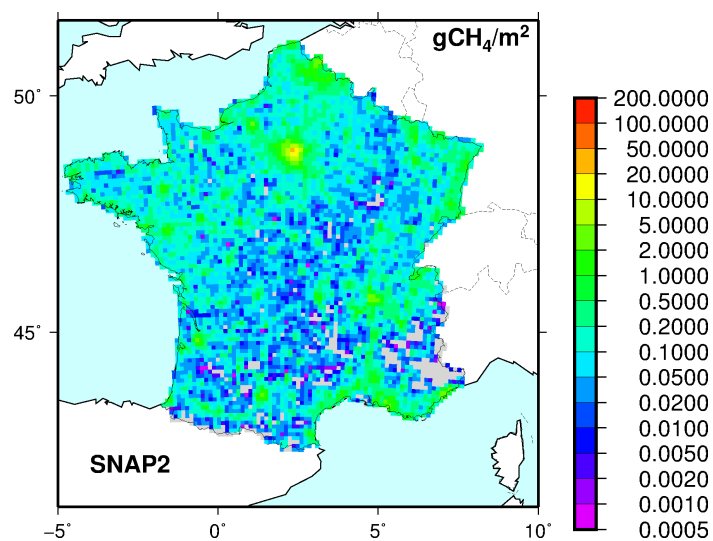

**Figure S.14.** SNAP 2: non-industrial combustion plants, yearly total in France in 2012: 107 Gg.

### S.3 Information used at the measurement sites in 2012

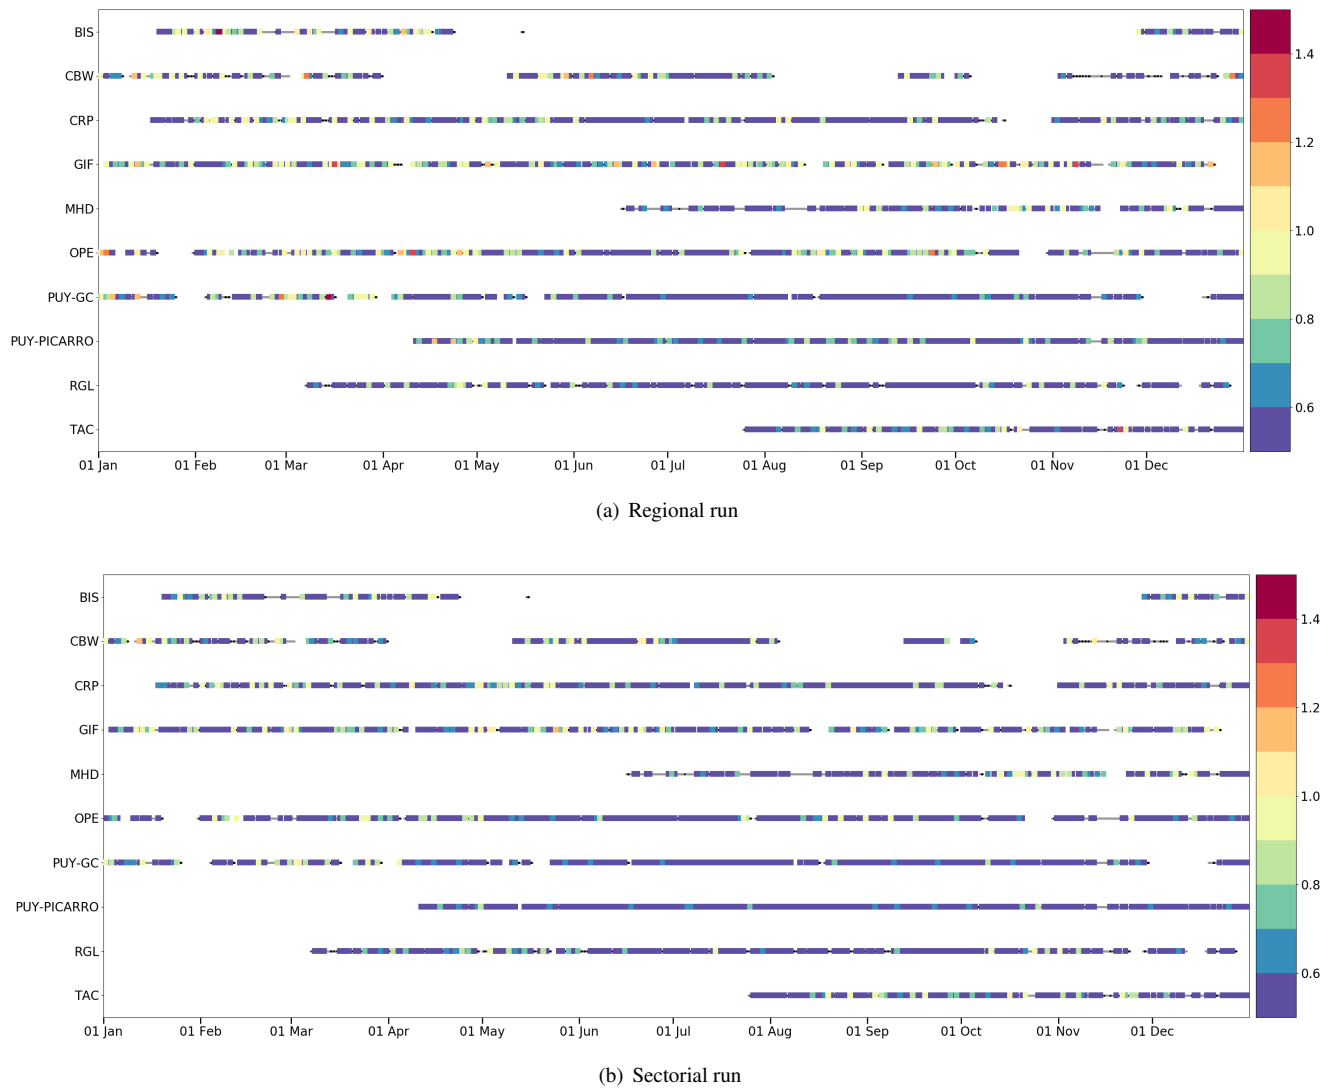

**Figure S.15.** Available hourly means of  $\text{CH}_4$  mixing ratios and contribution of each site to the inversion of  $\text{CH}_4$  emissions: available data in grey; selected data (between 14 h and 18 h UTC when the boundary layer height is higher than 500 m in the model) in black; on the colour scale, data actually used by the inversion i.e after filtering out plume situations and under-constrained areas: the value gives the information brought each day (from 0 to a maximum of 5 for the 5 hourly means between 14 and 18 h included); it is computed from the diagonal terms of the sensitivity matrix. A value of 1 means that the data assimilation system uses the equivalent of one hourly mean.
